# Supplementary material for: Temperature-controlled formation of inverse mesophases assembled from a rod–coil block copolymer
Source: Royal Society of Chemistry journal article supplement (doi:10.1039/c9py01257e), 2019-01-01
Supplement: c9py01257e1.pdf [file c9py01257e1.pdf]

# Temperature-Controlled Formation of Inverse Mesophases Assembled from a Rod–Coil Block Copolymer

Xiaolin Lyu, Zehao Tang, Anqi Xiao, Wei Zhang, Hongbing Pan, Zhihao Shen,\* and Xing-He Fan

*Beijing National Laboratory for Molecular Sciences, Key Laboratory of Polymer Chemistry and Physics of Ministry of Education, Center for Soft Matter Science and Engineering, College of Chemistry and Molecular Engineering, Peking University, Beijing 100871, China*

\* To whom the correspondence should be addressed. E-mail: zshen@pku.edu.cn

## Table of Contents

|                                                                                                                        |    |
|------------------------------------------------------------------------------------------------------------------------|----|
| Synthetic procedure                                                                                                    | S2 |
| Table S1 Characteristics of PEO- <i>b</i> -PMPCS                                                                       | S2 |
| Fig. S1 GPC curves of PEO- <i>b</i> -PMPCS                                                                             | S3 |
| Fig. S2 <sup>1</sup> H NMR spectrum of PEO- <i>b</i> -PMPCS                                                            | S3 |
| Fig. S3 SEM, TEM, and SAXS results of E <sub>45</sub> M <sub>59</sub> at different temperatures                        | S3 |
| Fig. S4 SEM, TEM, and SAXS results of E <sub>45</sub> M <sub>62</sub> at different temperatures                        | S4 |
| Fig. S5 SAXS and SEM results of E <sub>45</sub> M <sub>59</sub> and E <sub>45</sub> M <sub>62</sub> at 50 °C and 60 °C | S5 |
| Fig. S6 SEM, TEM, and SAXS results of E <sub>45</sub> M <sub>70</sub> at 20 °C                                         | S5 |
| Fig. S7 SEM, TEM, and SAXS results of E <sub>45</sub> M <sub>76</sub> at different temperatures                        | S6 |
| Fig. S8 The schematic of the structure with more negative curvature                                                    | S6 |
| Fig. S9 SEM micrographs of the silica cubosome                                                                         | S6 |
| Fig. S10 SEM micrographs of the surfaces of the polymer and silica cubosomes                                           | S7 |

## Synthesis of PEO-*b*-PMPCS

The monomethyl ether PEO2000 used was bought from Aldrich-Sigma. Its molar mass was confirmed by gel permeation chromatography (GPC) and matrix-assisted laser desorption/ ionization time of flight (MALDI-TOF) mass spectrometry, which was consistent with the label of the monomethyl ether PEO2000. The macroinitiator was prepared through esterification reaction between PEO2000 and 2-bromoisobutyryl bromide, and the purified white product was obtained by recrystallization for five times in diethyl ether.<sup>1</sup> Its chemical structure was confirmed by <sup>1</sup>H NMR (Fig. S2a). The synthesis of the monomer 2,5-bis[(4-methoxyphenyl)-oxycarbonyl]styrene (MPCS) can refer to the previous work.<sup>2-3</sup> And poly(ethylene oxide)-*b*-poly{2,5-bis[(4-methoxyphenyl)-oxycarbonyl]styrene} (PEO-*b*-PMPCS) was synthesized by atom-transfer radical polymerization (ATRP).<sup>1</sup> The <sup>1</sup>H NMR results of the block copolymers are shown in Fig. S2c.

**Table S1. PEO-*b*-PMPCS Samples Characterized by <sup>1</sup>H NMR and GPC**

| Sample | <sup>1</sup> H NMR <sup>a</sup> |                              |                                            | GPC <sup>c</sup>                |                              |                                            |                                   |
|--------|---------------------------------|------------------------------|--------------------------------------------|---------------------------------|------------------------------|--------------------------------------------|-----------------------------------|
|        | Notation                        | <i>M<sub>n</sub></i> (g/mol) | <i>f</i> <sub>PMPCS</sub> (%) <sup>b</sup> | Notation                        | <i>M<sub>n</sub></i> (g/mol) | <i>f</i> <sub>PMPCS</sub> (%) <sup>b</sup> | <i>D<sub>M</sub></i> <sup>d</sup> |
| 1      | E <sub>45</sub> M <sub>59</sub> | 25800                        | 91.3                                       | E <sub>45</sub> M <sub>37</sub> | 16900                        | 86.8                                       | 1.16                              |
| 2      | E <sub>45</sub> M <sub>62</sub> | 27000                        | 91.7                                       | E <sub>45</sub> M <sub>40</sub> | 18100                        | 87.7                                       | 1.17                              |
| 3      | E <sub>45</sub> M <sub>70</sub> | 30300                        | 92.6                                       | E <sub>45</sub> M <sub>50</sub> | 22300                        | 90.0                                       | 1.20                              |
| 4      | E <sub>45</sub> M <sub>76</sub> | 32700                        | 93.1                                       | E <sub>45</sub> M <sub>53</sub> | 23400                        | 90.4                                       | 1.25                              |

<sup>a</sup> The DPs of PMPCS and number-averaged MWs were determined by <sup>1</sup>H NMR.

<sup>b</sup> The densities of PEO and PMPCS at 1.13 g/cm<sup>3</sup> and 1.28 g/cm<sup>3</sup>, respectively, were used to calculate the volume fraction of PMPCS (*f*<sub>PMPCS</sub>).

<sup>c</sup> The DPs of PMPCS and number-averaged MWs were determined by GPC.

<sup>d</sup> The molar-mass dispersity (*D<sub>M</sub>*) values were determined by GPC.

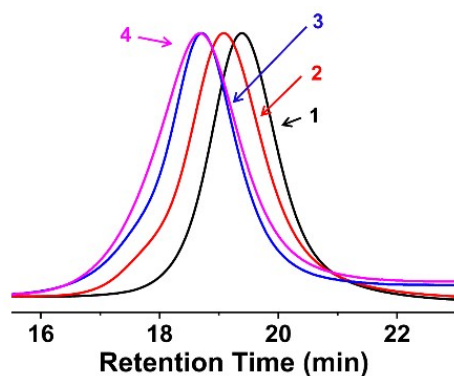

**Fig. S1** GPC curves of PEO-*b*-PMPCS with different molecular weights.

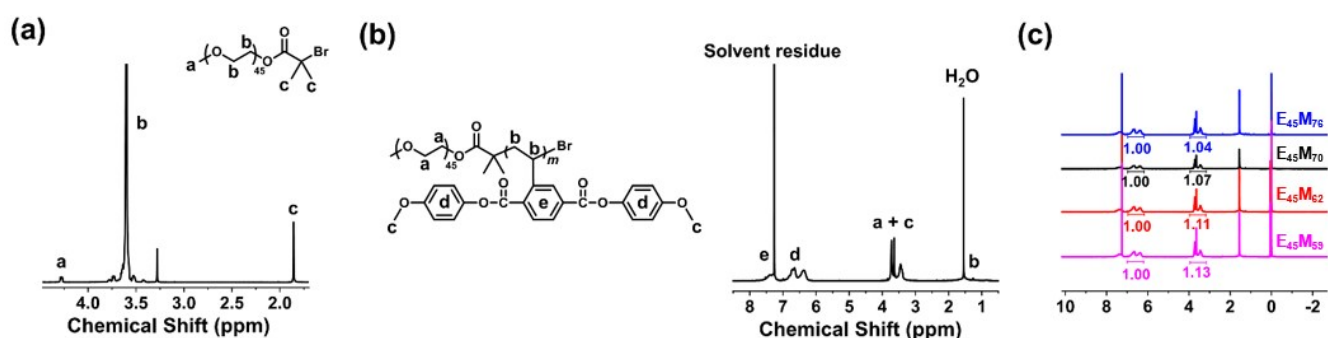

**Fig. S2**  $^1\text{H}$  NMR spectra of PEO with  $\text{D}_2\text{O}$  as the solvent (a), PEO-*b*-PMPCS with  $\text{CDCl}_3$  as the solvent (b), and the four PEO-*b*-PMPCS used in this work with  $\text{CDCl}_3$  as the solvent (c). ( $m$  is calculated with the equation,  $m = 22.5 / (I_{a+c}/I_d - 0.75)$ , where  $I_{a+c}$  and  $I_d$  are the integrals of hydrogen peaks shown above.).

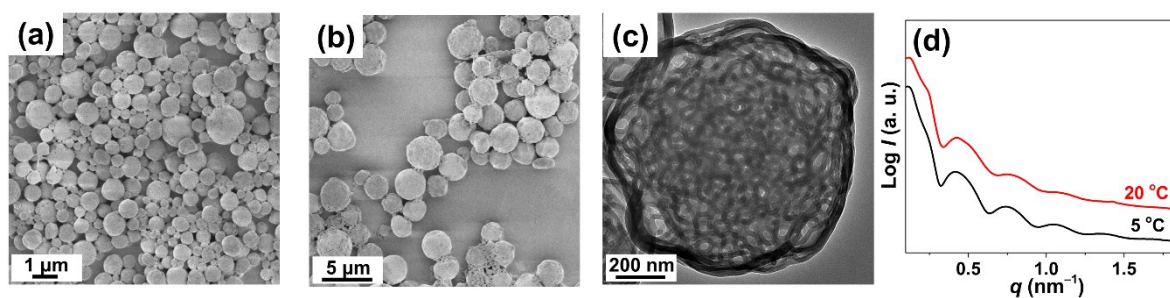

**Fig. S3** SEM micrograph of the spongy structure self-assembled by  $\text{E}_{45}\text{M}_{59}$  at 5 °C (a); SEM (b) and TEM (c) micrographs of the spongy structure self-assembled by  $\text{E}_{45}\text{M}_{59}$  at 20 °C; SAXS profiles of spongy structures self-assembled by  $\text{E}_{45}\text{M}_{59}$  at 5 and 20 °C (d).

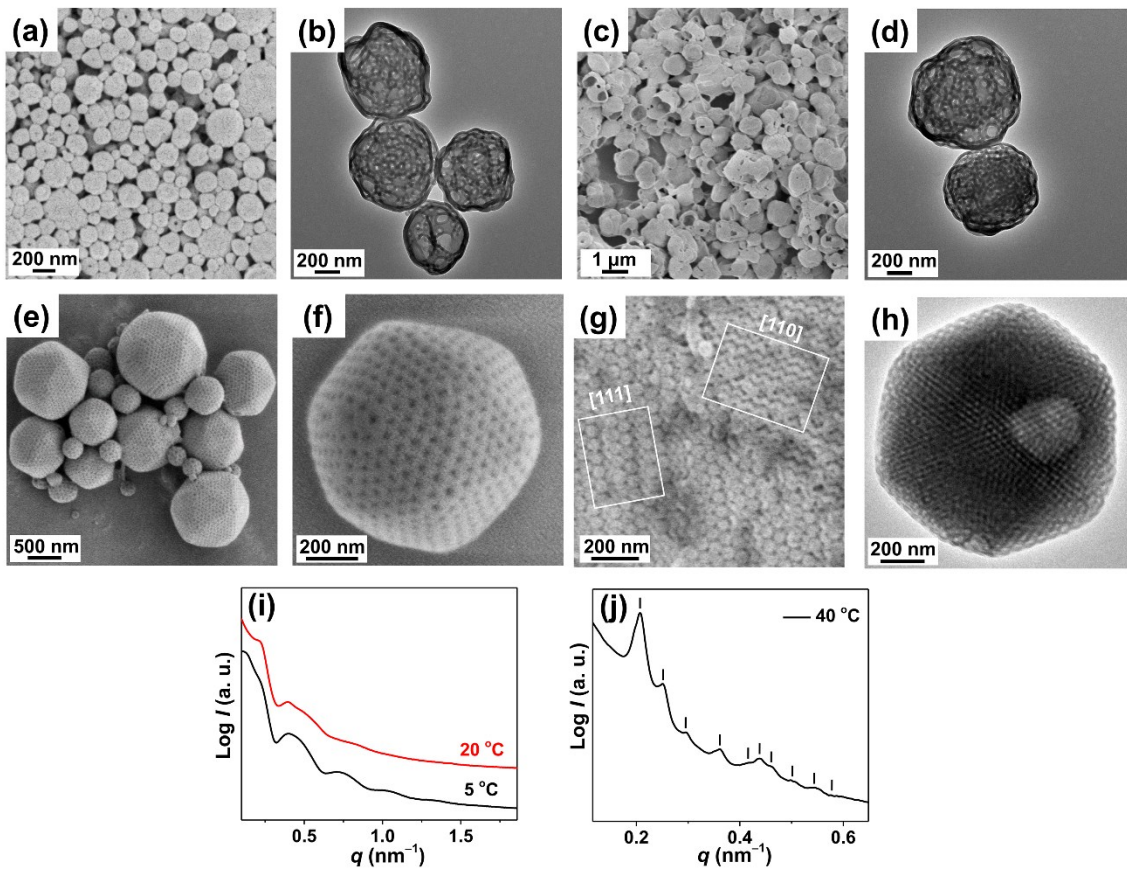

**Fig. S4** SEM and TEM micrographs of spongy structures self-assembled by  $E_{45}M_{62}$  at 5 °C (a, b) and 20 °C (c, d); low-magnification (e) and high-magnification (f) SEM micrographs, SEM micrograph viewed along the [110] and [111] directions (g), and TEM micrograph (h) of the  $Pn\bar{3}m$  polymer cubosome self-assembled by  $E_{45}M_{62}$  at 40 °C; SAXS profiles of  $E_{45}M_{62}$  self-assembling at 5 °C, 20 °C (i), and 40 °C (j). (The scattering vector ratio of the peaks in Fig. S4j is  $2^{1/2}:3^{1/2}:4^{1/2}:6^{1/2}:8^{1/2}:9^{1/2}:10^{1/2}:12^{1/2}:14^{1/2}:16^{1/2}$ , corresponding to the (110), (111), (200), (211), (220), (221), (310), (222), (321), and (400) reflections of a  $Pn\bar{3}m$  cubic cell with  $a = 43.1$  nm)

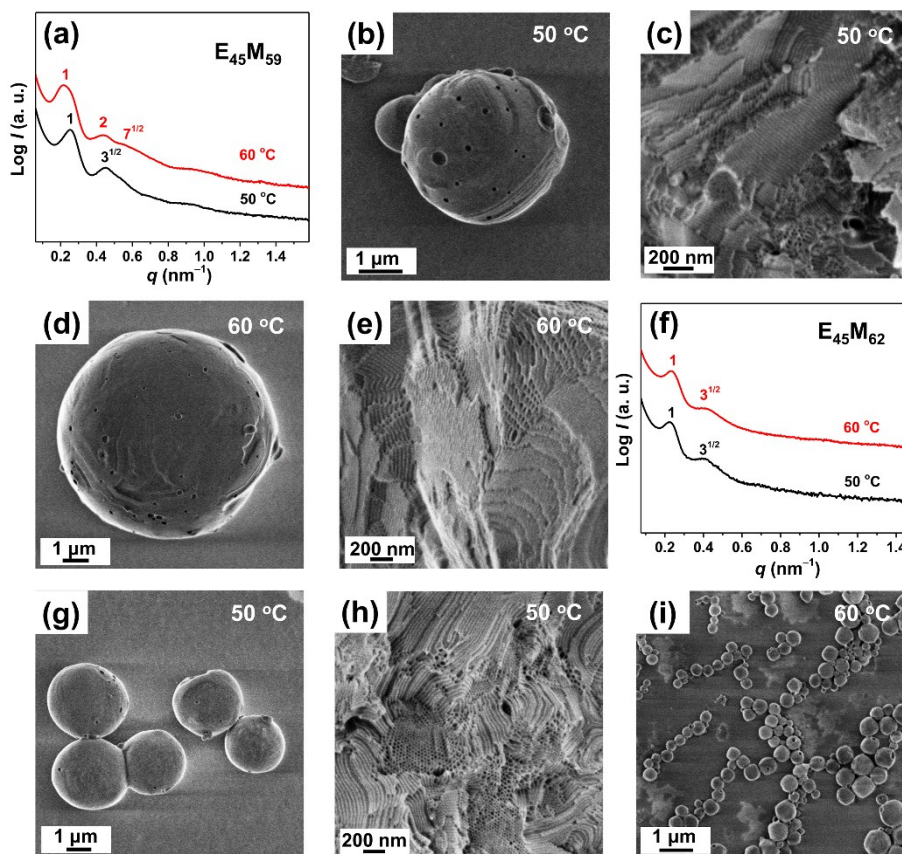

**Fig. S5** SAXS profile of  $p6mm$  polymer hexasomes self-assembled by  $E_{45}M_{59}$  at 50 °C and 60 °C (a); SEM micrographs of polymer hexasomes self-assembled by  $E_{45}M_{59}$  at 50 °C (b, c) and 60 °C (d, e); SAXS profile of  $p6mm$  polymer hexasomes self-assembled by  $E_{45}M_{62}$  at 50 °C and 60 °C (f); SEM micrographs of polymer hexasomes self-assembled by  $E_{45}M_{62}$  at 50 °C (g, h) and 60 °C (i).

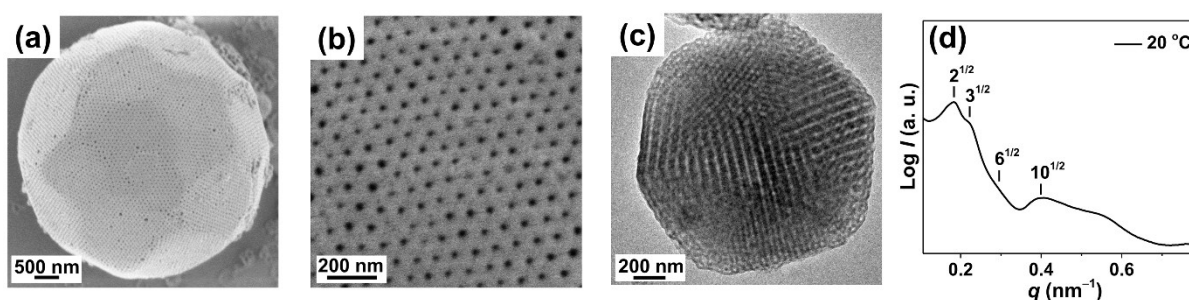

**Fig. S6** Low-magnification (a) and high-magnification (b) SEM micrographs, TEM micrograph (c), and SAXS profile (d) of the  $Pn\bar{3}m$  polymer cubosome self-assembled by  $E_{45}M_{70}$  at 20 °C.



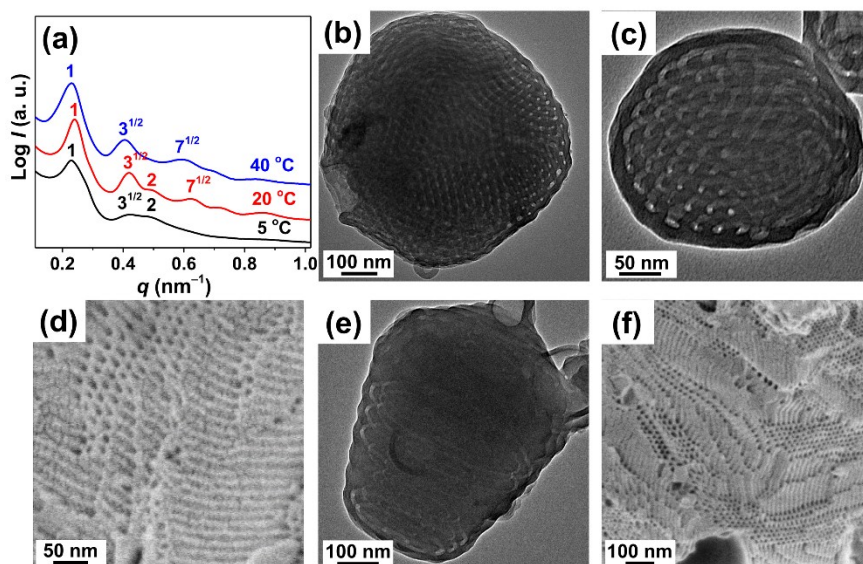

**Fig. S7** SAXS profiles of  $E_{45}M_{76}$  self-assembling at different temperatures (a); TEM micrograph of the  $p6mm$  polymer hexasome self-assembled by  $E_{45}M_{76}$  at 5 °C (b); TEM and SEM micrographs of  $p6mm$  polymer hexasomes self-assembled by  $E_{45}M_{76}$  at 20 °C (c, d) and 40 °C (e, f).

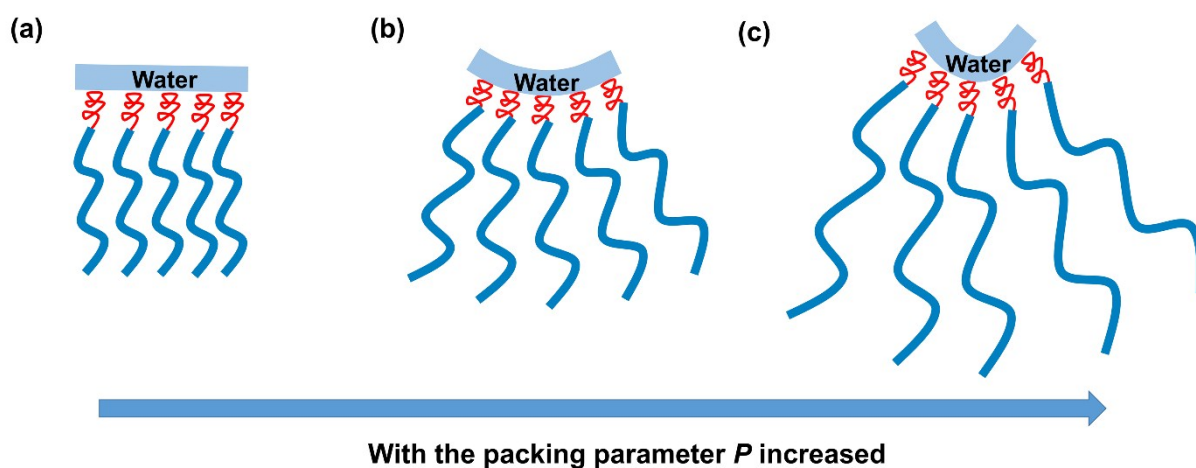

**Fig. S8** The variations of the curvature towards the water side and packing parameter with increasing volume and chain length of the hydrophobic part in solutions.

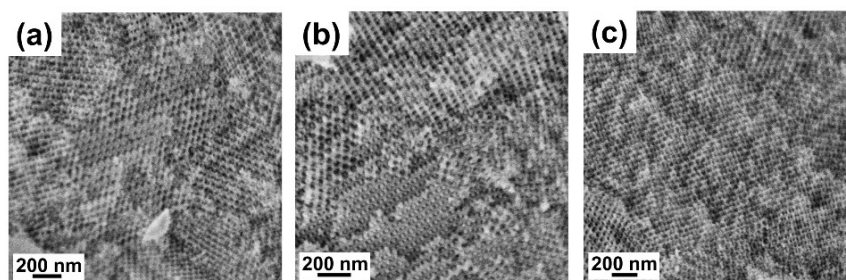

**Fig. S9** SEM micrographs of the  $Pn\bar{3}m$  silica cubosome observed from different orientations.

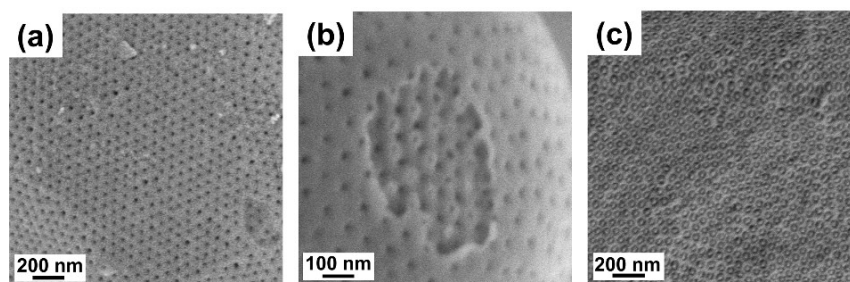

**Fig. S10** SEM micrographs of the surface (a) and fractured surface (b) of the  $Pn\bar{3}m$  polymer cubosome and that of the surface of the silica cubosome (c).

- (1) Lyu, X.; Xiao, A.; Zhang, W.; Hou, P.; Gu, K.; Tang, Z.; Pan, H.; Wu, F.; Shen, Z.; Fan, X.-H. Head-Tail Asymmetry Determines the Formation of Polymer Cubosomes or Hexasomes in A Rod-Coil Amphiphilic Block Copolymer. *Angewandte Chemie International Edition* **2018**, *57*, 10132-10136.
- (2) Zhang, D.; Liu, Y.-X.; Wan, X.-H.; Zhou, Q.-F. Synthesis and Characterization of A New Series of "Mesogen-Jacketed Liquid Crystal Polymers" Based on the Newly Synthesized Vinylterephthalic Acid. **1999**, *32*, 5183-5185.
- (3) Ye, C.; Zhang, H.-L.; Huang, Y.; Chen, E.-Q.; Lu, Y.; Shen, D.; Wan, X.-H.; Shen, Z.; Cheng, S. Z. D.; Zhou, Q.-F. Molecular Weight Dependence of Phase Structures and Transitions of Mesogen-Jacketed Liquid Crystalline Polymers Based on 2-Vinylterephthalic Acids. **2004**, *37*, 7188-7196.
